Targeting default mode network connectivity with mindfulness-based fMRI neurofeedback: A pilot study among adolescents with affective disorder history

Jiahe Zhang, PhD<sup>1</sup>, Jovicarole Raya, MS<sup>1</sup>, Francesca Morfini, MS<sup>1</sup>, Zoi Urban, BA<sup>1</sup>, David Pagliaccio, PhD<sup>2,3</sup>, Anastasia Yendiki, PhD<sup>4</sup>, Randy P. Auerbach, PhD<sup>2,3,5\*</sup>, Clemens C.C. Bauer, MD, PhD<sup>1,6\*</sup>, Susan Whitfield-Gabrieli, PhD<sup>1,4,6\*</sup>

<sup>1</sup>Department of Psychology, Northeastern University, Boston, MA 02115

<sup>2</sup>Department of Psychiatry, Columbia University, New York, NY 10032

<sup>3</sup>New York State Psychiatric Institute, New York, NY 10032

<sup>4</sup>Athinoula A. Martinos Center for Biomedical Imaging, Massachusetts General Hospital & Harvard Medical School, Boston, MA 02129

<sup>5</sup>Division of Clinical Developmental Neuroscience, Sackler Institute, New York, NY 10032

<sup>6</sup>Department of Brain and Cognitive Sciences and McGovern Institute for Brain Research, Massachusetts Institute of Technology, Cambridge, MA 02139, USA

Corresponding Author:

Dr. Jiahe Zhang, 125 Nightingale Hall, Northeastern University, Boston, MA 02115

Tel: 617-373-3076; Email: [j.zhang@northeastern.edu](mailto:j.zhang@northeastern.edu)

Author Contributions:

JZ, AY, RPA, CCCB and SWG designed research; JZ, JR, ZU, CCCB and SWG performed research; JZ, JR, FM, ZU, DP, RPA, CCCB and SWG analyzed data and wrote the manuscript. All authors read and approved the manuscript.

\*CCCB, RPA and SWG share senior authorship.

## ABSTRACT

Adolescents experience alarmingly high rates of major depressive disorder (MDD), however, gold-standard treatments are only effective for ~50% of youth. Accordingly, there is a critical need to develop novel interventions, particularly ones that target neural mechanisms believed to potentiate depressive symptoms. Directly addressing this gap, we developed a mindfulness-based fMRI neurofeedback (mbNF) for adolescents that targets default mode network (DMN) hyperconnectivity, which has been implicated in the onset and maintenance of MDD. In this proof-of-concept study, adolescents ( $n = 9$ ) with a lifetime history of depression and/or anxiety were administered clinical interviews and self-report questionnaires, and then, each participant's DMN and central executive network (CEN) were personalized using a resting state fMRI localizer. After the localizer scan, adolescents completed a brief mindfulness training followed by a mbNF session in the scanner wherein they were instructed to volitionally reduce DMN relative to CEN activation by practicing mindfulness meditation. Several promising findings emerged. First, mbNF successfully engaged the target brain state during neurofeedback; participants spent more time in the target state with DMN activation lower than CEN activation. Second, in each of the nine adolescents, mbNF led to significantly reduced within-DMN connectivity, which correlated with post-mbNF increases in state mindfulness. Last, a reduction of within-DMN connectivity mediated the association between better mbNF performance and increased state mindfulness. These findings demonstrate that personalized mbNF can effectively and non-invasively modulate the intrinsic networks known to be associated with the emergence and persistence of depressive symptoms during adolescence.

## INTRODUCTION

In the United States, major depressive disorder (MDD) results in over \$200 billion of lost productivity and health care expenses each year (1), and for adolescents specifically, rates are alarmingly high (2). Gold-standard psychological and pharmacological treatments, however, are only effective for ~50% of youth (3), underscoring the critical need to develop novel treatments to improve clinical outcomes, particularly those that target core mechanisms that may underlie depression.

At the neural systems level, MDD is characterized by elevated resting state connectivity within the default mode network (DMN), which includes core midline hub regions in the subgenual anterior cingulate cortex (sgACC), medial prefrontal cortex (MPFC), and posterior cingulate cortex (PCC) (4,5). DMN hyperconnectivity, especially sgACC hyperconnectivity, is associated with symptom severity in depressed individuals (6,7) and characterizes children with elevated familial risk for depression (8). The DMN is thought to facilitate patterns of depressogenic, self-referential processing and a heightened focus on distressing emotional states (4,9–11); in MDD, it is theorized that dysregulation of the DMN by top-down control networks such as the central executive network (CEN), as evidenced by altered connectivity between the DMN and CEN (12,13), also contributes to heightened self-focus. As such, hyperconnectivity within the DMN has been linked to rumination (i.e., the tendency to perseverate about one's symptoms), a common trait that contributes to depression onset, maintenance, and recurrence (14–16) as well as predicts cognitive therapy non-response and relapse (15,17).

As DMN connectivity is a promising biomarker of MDD (7,18), new interventions targeting DMN have recently been explored. For example, transcranial magnetic stimulation (TMS) targeting the dorsolateral prefrontal cortex (i.e., a CEN node that is anticorrelated with DMN) normalizes DMN connectivity and improves depressive symptoms in adults (19). TMS, however, relies on an external source of energy to stimulate brain tissue and alter brain connectivity. TMS can be invasive, as it is a targeted transcutaneous procedure (20). Accordingly, additional safety and efficacy evidence is warranted before routine clinical TMS can be used with children and adolescents. By contrast, mindfulness-based interventions are non-invasive and also can lead to decreased DMN activity (21–25) and connectivity (26)

## Mindfulness-Based Neurofeedback

by leveraging an individual's own cognitive resources to train attentional focus to the present moment. Mindfulness-based therapeutic approaches also reduce depression symptoms (27,28) and improve depression treatment outcomes (29,30). Our and others' research have demonstrated that adolescents can apply mindfulness practices to reduce depression symptoms, including perceived stress (31,32). Yet, specific depressive symptoms (e.g., inattention, lack of energy, apathy, etc.) may prevent adolescents from more successfully integrating and applying mindfulness strategies in daily life.

To facilitate the acquisition and utilization of mindfulness strategies, we recently developed a novel mindfulness-based fMRI neurofeedback (mbNF; (33)) approach, which is a non-invasive technique that allows people to track and directly modulate brain function. To date, neurofeedback studies in depression have frequently involved mood-related tasks, such as negative emotion induction or valenced autobiographical memory recall (see review in (34)). By contrast, our mbNF targets DMN connectivity given known associations with mindfulness and MDD. In this 15-minute neurofeedback paradigm, people observe a schematic visual representation of their brain activity and practice mindfulness to volitionally reduce DMN activation relative to CEN activation. We previously used this paradigm in adults with schizophrenia and demonstrated that mbNF reduced DMN connectivity and led to symptom reduction post-intervention (35). This mbNF method is non-invasive, optimizes implementation of mindfulness to target the DMN, and has enormous potential to translate skill acquisition outside of the scanner.

Building on our prior fMRI neurofeedback research (35,36), we tested mbNF in adolescents with a history of affective disorders as a proof-of-concept. First, we tested whether adolescents can successfully engage CEN more than DMN during mbNF. Second, we tested whether mbNF leads to reduced DMN connectivity and an associated increase in state mindfulness. Third, we tested whether reduced DMN connectivity accounted for the association between successful neurofeedback and increased state mindfulness.

## **METHODS AND MATERIALS**

### **Participants and Procedure**

Adolescents ( $n = 9$ ;  $18.8 \pm 0.7$  years; 17-19 years; 66.7% females) who previously completed scans for the Boston Adolescent Neuroimaging of Depression and Anxiety Human Connectome project (BANDA; (37,38)) were re-contacted, screened and enrolled in this proof-of-concept study.

Sociodemographic and clinical characteristics are summarized in **Table 1**; all participants reported a lifetime history of MDD and/or anxiety disorders.

For Session 1, which was a follow-up to the BANDA protocol, study procedures were approved through the Mass General Brigham IRB. At the baseline visit, participants were administered a clinical interview and self-report assessments of depressive and anxiety symptoms. Then, each participant completed a localizer MRI session at the Athinoula A. Martinos Center for Biomedical Imaging. At the end of Session 1, participants were provided with information for Session 2 and interested participants were enrolled. Session 2 procedures were approved by the Northeastern University Institutional Review Board, and typically occurred within 2-3 weeks. Participants underwent mindfulness meditation training, completed a neurofeedback MRI session at the Northeastern University Biomedical Imaging Center, and completed pre- and post-scan state mindfulness assessments.

## **Session 1**

*Clinical assessments.* Participants were administered the Kiddie Schedule for Affective Disorders and Schizophrenia Present and Lifetime Version (KSADS; (39)) to assess the occurrence of psychiatric disorders since their prior study visit (i.e., past 2-3 years). Participants completed the Child Self-Report of the Mood and Feelings Questionnaire (MFQ; (40)) to assess depression symptom severity. The MFQ is a 33-item questionnaire, and the total score ranges between 0-66, with higher scores indicating more severe depression symptoms. Participants also completed the Revised Child Anxiety and Depression Scale (RCADS; (41)). The primary subscales of interest characterize general anxiety and social anxiety symptoms.

*Functional Localizer.* MRI data was acquired on a Siemens Prisma scanner with a 64-channel, phased-array head coil (Siemens Healthcare, Erlangen, Germany), including: a T1-weighted MPRAGE

structural scan [0.8 mm isotropic voxel size, 208 slices, field-of-view (FOV) = 256 x 240 x 167 mm, repetition time (TR) = 2400 ms, echo time (TE) = 2.18 ms, flip angle (FA) = 8°] and two resting state fMRI scans (rs-fMRI: 5 minutes 46 seconds each, multiband acceleration factor = 8, 2 mm isotropic voxel size, 72 slices, FOV = 208 x 208 x 144 mm, TR = 800 ms, TE = 37 ms, FA = 52°) to identify participant-specific DMN and CEN maps.

Preprocessing of rs-fMRI data was performed in FSL 6.0 (42) and included: motion correction, brain extraction, co-registration, smoothing and bandpass filtering (see more details in (35)). We performed an independent components analysis (ICA) on the preprocessed functional scans using Melodic ICA version 3.14 (43) with dimensionality estimation using the Laplace approximation to the Bayesian evidence of the model. Each of the ~30 spatiotemporal components were statistically compared to atlas spatial maps of the DMN and CEN derived from rs-fMRI of ~1000 participants (44) using FSL's "fslcc" tool and we select the ICA components that yielded the highest spatial correlation for each participant. These ICA components were thresholded to select the upper 10% of voxel loadings and then binarized to obtain participant-specific DMN and CEN masks to be used during neurofeedback in Session 2. Visual inspection was performed and all components maps were determined to be satisfactory in covering canonical DMN and CEN brain regions (45).

## Session 2

In Session 2, participants completed: pre-mbNF state mindfulness assessment, mindfulness training, structural scan, pre-mbNF rs-fMRI, mbNF, post-mbNF rs-fMRI, post-mbNF state mindfulness assessment.

*State Mindfulness.* Participants completed the State Mindfulness Scale (SMS; (46)) by indicating on a 5-point scale their perceived level of awareness and attention to their present experience during the last 15 minutes. The SMS was scored both as a sum of all 21 items (ranges 0-105) as well as two subscales assessing 15 items on mindfulness of the mind (i.e., thoughts and emotions; ranges 0-75) and 6 items on mindfulness of the body (i.e., movement and physical sensations; ranges 0-30).

*Mindfulness Training.* We trained participants on a mindfulness technique called “mental noting”. Mental noting is a major component of Vipassana or insight meditation practice (47) and consists of the factors “concentration” and “observing sensory experience”. The experimenter first explained to the participants that mental noting entails being aware of the sensory experience without engaging in or dwelling on the details of the content; in other words, one would “note” the sensory modality (e.g., “hearing”, “seeing”, “feeling”) at the forefront of their awareness and then let it go after it has been noted. The experimenter also introduced the concept of an “anchor”, or a sensory experience to which one could easily switch their attention, such as breathing. Participants were encouraged to use their personal “anchors” when they noted consecutive “thinking” (i.e., rumination). The experimenter demonstrated noting out loud by verbalizing the predominant sensory modality approximately once per second. Participants were then asked to practice mental noting out loud to demonstrate the ability to describe sensory awareness without engaging in the content and stop consecutive “thinking”.

To assess the effectiveness of mindfulness training, participants listened to audio recordings of brief stories before and after training and were asked to complete mental noting after training. This included five stories describing everyday, mundane characters and events recorded on audio in neutral tone. Each story lasted about half a minute and included 20 unique details. For example, in the sentence “Grandpa owns a garden”, there are 3 unique details (i.e., “grandpa”, “owns”, “garden”). Immediately before the participants learned about mental noting, they listened to one story and were asked to freely recall as many details as possible. After participants learned mental noting, we asked them to practice mental noting while we played stories (i.e., introducing salient auditory stimulus). The number of stories ranged between 2-4 and we stopped either after the participant was comfortable at the practice or after all remaining 4 stories were played. Compared to the baseline test when participants fully attended to story playback, usage of noting strategy during playback led to a significantly reduced number of details recalled [ $t(8) = -16.20, p < 0.001$ ], indicating that participants were successfully engaging the noting strategy and therefore not retaining the details of the story.

*mbNF*. During the neurofeedback task, participants observed one centrally displayed white dot and two circles on the screen (**Fig.1**). The schema displays a red circle on top with a blue circle below. Participants were instructed to move the white dot into the red circle by performing mental noting. We explained that upward movement of the dot was associated with effective mental noting performance and downward movement was associated with excessive self-related processing and mind-wandering. We asked the participants immediately after the neurofeedback task whether they had used the mental noting strategy during neurofeedback; each participant reported using mental noting.

There were five neurofeedback runs in this protocol and each lasted 2.5 minutes. We provided real-time feedback to the participants by means of a Positive Diametric Activity (PDA) metric (Bauer et al., 2019; Bauer et al., 2020) (**Fig. 1**). The PDA metric is based on the hypothesis that there is a causal neural mechanism by which the CEN negatively regulates the DMN (Chen et al., 2013). Accordingly, we defined the PDA as CEN activation estimate minus DMN activation estimate. The CEN and DMN estimates were calculated as the mean activity estimate across all voxels within each participant-specific mask as defined by Session 1 rs-fMRI (see *Session 1: Functional Localizer*) and co-registered to the current fMRI volumes. To accomplish the voxel-wise estimation in real-time (48), we first collected 30 seconds of baseline data and then continuously performed an incremental general linear model (GLM) fit with subsequent incoming images. This method accounts for the mean voxel signal and linear trends. To discount components of the voxel signal due to nuisance sources (e.g., low-frequency signal drifts), the GLM reconstruction of the expected voxel intensity at time  $t$  was subtracted from the measured voxel intensity at time  $t$ , leaving a residual signal that has components due to two sources: BOLD signal fluctuations and unmodeled fMRI noise. This residual was scaled by an estimate of voxel reliability, which was computed as the average GLM residual over the first 25 functional images of the baseline. This analysis resulted in an estimate of the strength of activation at each voxel at time  $t$  in units of standard deviation.

## **Session 2 MRI Acquisition, Preprocessing and Data Analytic Overview**



*MRI Acquisition.* A structural scan was acquired using a T1-weighted MPRAGE pulse sequence (1 mm isotropic voxel size, 176 slices, FOV = 256 x 256 x 256 mm, TR = 2530 ms, TE = 46 ms, FA = 7°). For functional images including during mbNF, the BOLD signal was measured using a T2\* weighted gradient-echo, echo-planar imaging (EPI) pulse sequence (2 mm isotropic voxel size, 68 slices, FOV = 256 x 256 x 256 mm, TR = 1200 ms, TE = 30 ms, FA = 72°). Each neurofeedback run lasted 2 minutes and 30 seconds. Immediately before and after mbNF, two rs-fMRI scans (5 minutes each) were acquired.

*MRI Preprocessing.* Preprocessing was performed using *fMRIPrep* 21.0.0 (49,50), which is based on *Nipype* 1.6.1 (51,52). In short, common preprocessing steps were performed including realignment, co-registration, normalization, susceptibility distortion correction, segmentation of gray matter (GM), white matter (WM), cerebrospinal fluid (CSF) tissues, skull stripping, and confounds extraction. See Supplementary Information for a detailed description. Visual quality control was performed on each preprocessed run.

Preprocessed data and confound time series were imported into the CONN Toolbox v20.b (53) where outlier identification was performed with the Artifact Detection Tools (ART, [www.nitrc.org/projects/artifact\\_detect](http://www.nitrc.org/projects/artifact_detect)). Volumes with global signal  $z > 5$  and framewise displacement  $> 0.9\text{mm}$  compared to the previous frame were flagged as outliers. In addition, in-scanner mean motion was defined as the mean framewise displacement of the whole run (42) and calculated separately for pre- and post rtfMRI-NF runs. Rs-fMRI runs were spatially smoothed with a 6mm Gaussian kernel. A principal component analysis identified noise components from the WM and CSF following CONN's implementation (54) of the aCompCorr method (55). During denoising, we regressed out the effect of the top 5 WM noise components, top 5 CSF noise components, 12 realignment parameters (3 translation, 3 rotation, and their first derivatives), linear drift and its first derivative effect, motion outliers, and applied a band-pass filter of 0.008 – 0.09 HZ.

*Data Analytic Overview.* Using the CONN toolbox (53), we performed functional connectivity analyses seeding the sgACC (8mm-radius sphere around MNI -2, 22, -16) (56). For baseline brain-behavior correlation analysis, we searched the whole brain for regions where connectivity with the seed

correlated with MFQ scores at  $p < 0.001$  (uncorrected). For functional connectivity change, we used SPM small volume correction to search midline DMN regions (MPFC and PCC nodes as defined in CONN toolbox DMN network) for voxels whose connectivity with the seed region changed significantly after mbNF and reported clusters that survived a FDR-corrected threshold of  $q = 0.05$ . Both analyses controlled for framewise displacement (57). We performed MPFC-seeded analyses as well (8mm-radius sphere around MNI -1, 53, -3) (58) and results can be found in the Supplementary Information.

## RESULTS

### DMN-Depressive Symptom Severity Association

In line with prior research (6,7), current depression symptom severity (MFQ) positively correlated ( $p < 0.001$ , uncorrected) with functional connectivity between the sgACC seed (**Fig. 2A**) and several regions, including the MPFC (**Fig. 2B**; 21 voxels; peak at MNI -6, 66, 18), right lateral temporal cortex (32 voxels; peak at MNI) and middle frontal gyrus (28 voxels; peak at MNI). Specifically, more severe depression symptoms were associated with greater connectivity between the sgACC seed and the MPFC (scatterplot shown in **Fig. 2C**).

### Neurofeedback Performance

Averaging across all 5 neurofeedback runs, participants spent more time in the target brain state (i.e., CEN > DMN activation) than expected by chance ( $p = .038$ , one-tailed t-test against 50% chance). Additionally, participants exhibited marginally higher CEN activation than DMN activation ( $p = .071$ , one-tailed paired-sample t-test), however, this effect was non-significant.

### Functional Connectivity Change Following mbNF

To test for changes in DMN functional connectivity following mbNF, we compared sgACC seed functional connectivity pre- vs. post-mbNF using a paired-sample t-test. We found that, at the group level,

the sgACC seed showed significantly reduced functional connectivity ( $q_{FDR} < 0.05$ ) to both MPFC (1003 voxels; MNI -8, 60, -6) and PCC (1185 voxels; MNI -4, -62, 28) after mbNF (**Fig. 3A**). Furthermore, when visualizing the individual-level data, we found that all nine participants showed sgACC-mPFC connectivity reduction (**Fig. 3B**). Additionally, we found a negative correlation between sgACC-MPFC connectivity change and neurofeedback performance. Participants who spent more time in the target brain state on the last neurofeedback run showed greater reduction in sgACC-MPFC functional connectivity ( $r = -.67, p = .048$ ; **Fig. 3C**). Average time spent in target state across 5 neurofeedback runs did not correlate with functional connectivity change.

### Changes in State Mindfulness Pre- to Post-mbNF

Compared to pre-mbNF, participants reported significantly increased total state mindfulness after mbNF [ $t(8) = 1.90, p = .047$ ], which was similarly observed in the mind [ $t(8) = 1.56, p = .079$ ] and body subscales [ $t(8) = 2.26, p = .027$ ]. As hypothesized, change in state mindfulness was positively correlated with neurofeedback performance. Specifically, participants who spent more time in the target brain state on the final neurofeedback run showed greater increases in SMS total ( $r = .69, p = .039$ ) as well as both the mind [ $r = .71, p = .031$ ] and body subscales [ $r = .59, p = .093$ ]. Further, we found a negative correlation between change in functional connectivity and change in state mindfulness. Relative to pre-mbNF, more reduction in sgACC-MPFC functional connectivity was associated with greater increases in state mindfulness (SMS Total) following mbNF (**Fig. 4A**;  $r = -.88, p = .002$ ). This association was consistent across the subscales (**Supplementary Fig. 1**; SMS Mind:  $r = -.87, p = .002$ ; SMS Body:  $r = -.82, p = .007$ ).

### DMN Functional Connectivity as a Mediator

Using mediation analysis (59,60), we found that functional connectivity change partially mediated the association between neurofeedback performance and state mindfulness change. We first regressed state mindfulness change on neurofeedback performance [ $b = 23.22, \beta = 0.69, t = 2.53, p$

= .039] (**Fig. 4B**; total effect, path a) and sgACC-MPFC connectivity change on neurofeedback performance [ $b = -0.12, \beta = -0.67, t = -2.39, p = .048$ ] (**Fig. 4B**; path b). Controlling for neurofeedback performance, the mediator (sgACC-MPFC connectivity change) significantly predicted state mindfulness change [ $b = -141.75, \beta = -0.76, t = -3.07, p = .022$ ] (Fig. 4B; path c). Further, controlling for the mediator (sgACC-MPFC connectivity change), neurofeedback performance was no longer a significant predictor of state mindfulness change [ $b = 6.07, \beta = 0.18, t = 0.73, p = .493$ ] (**Fig. 4B**; direct effect, path a'). The Sobel test indicated that mediation by the indirect effect (path bc) was approaching significance ( $t = 1.88, p = .060$ ).

## DISCUSSION

Depression is one of the most common mental disorders among adolescents, resulting in severe impairments. Accordingly, there is an urgent need to develop novel treatments to address escalating rates of depression among adolescents. In this proof-of-concept study, several key findings emerged, which support the feasibility of using fMRI neurofeedback to target adolescent depression symptoms. First, we demonstrated that participants successfully activated their individualized CEN more than DMN during mbNF. Second, we found that one session of successful mbNF led to reduced DMN connectivity and increased state mindfulness. Last, we found that reduction in sgACC-MPFC connectivity mediated the association between better neurofeedback performance and increase in state mindfulness.

The DMN consists of an ensemble of regions whose hyperactivation and hyperconnectivity result in altered self-referential processing and for some, may lead to rumination commonly occurring in MDD (7,18). There are a number of neuroanatomical landmarks implicated in the DMN (e.g., MPFC, PCC, angular gyrus, etc.) and our seed-based analysis approach privileged the sgACC as it shows specific alterations in MDD, including reduced glial cell count (61), abnormal blood flow and metabolism (62,63), abnormal thickness (64,65), reduced volume (61,62,66), and structural connectivity (67–69). Consistent

with previous research, our sgACC-based functional connectivity findings suggest that the sgACC is a special hub in depression pathology and treatment. Similar to previous studies (6–8), we found that at baseline (i.e., prior to mbNF), elevated sgACC connectivity to other DMN nodes was associated with more severe depression symptoms.

Our study also provided more causal evidence that after one session of mbNF, reduced DMN connectivity partially mediated the association between better neurofeedback performance and increased state mindfulness. This suggests that a change in DMN connectivity was necessary to facilitate the behavioral change (i.e., state mindfulness) post-mbNF and is consistent with previous literature showing association between higher trait mindfulness and lower DMN connectivity (70,71). In other words, dampening of DMN activity during mbNF and reduced DMN connectivity post-mbNF may provide favorable conditions for mindfulness acquisition. In a similar vein, a recent study teaching healthy adolescents to regulate PCC activity using mindfulness meditation demonstrated increased mindfulness immediately after the training as well as after one week (72). In both studies, participants down-regulated DMN activity with help from real-time neurofeedback and subsequently showed improvement in mindfulness, which may be a pathway to reduce negative repetitive thinking and other depression symptoms. These findings indicate that DMN-targeted real-time neurofeedback is a feasible approach to boost mindfulness acquisition and may help youth seeking to reap the benefits associated with mindfulness-based interventions overcome challenges that impede learning, such as training length (73) and existing or emerging mental health symptoms (74).

One major innovation in our study is that instead of targeting a single brain region (i.e., the PCC), we implemented network-based modulation (i.e., the DMN and the CEN). As cognitive neuroscience has evolved from localized models to attributing function to distributed systems and their interactions, neurofeedback research has expanded from feedback targeting activation of a single region to include feedback focused on multiple, related regions (75). In clinical settings, this may lead to more effective intervention because depression, like many other psychiatric disorders with heterogeneous phenotypes, shows networked neuropathology (76). By modulating entire circuitries, we may have a better chance of

directly normalizing altered brain connections and their associated functions. This is also one reason that we believe circuitry-based real-time fMRI neurofeedback may outperform focally targeted methods such as TMS and ultrasound. Indeed, another recent real-time fMRI study targeting dorsolateral prefrontal cortex-precuneus circuitry led to reduced depressive symptoms in patients (77).

One of the most encouraging findings from our study is that all 9 individuals who participated in the mbNF protocol demonstrated reduced DMN connectivity. This may be attributed to the personalized design of the protocol where the neurofeedback targets (i.e., DMN and CEN) were individually and functionally localized for each participant, which is in line with the broader mission in psychiatry towards utilizing biomarkers to guide precision medicine (78). By comparison, randomized controlled clinical trials for TMS – where treatment target is typically not functionally localized – demonstrates a response rate between 15%-37% and a remission rate between 14%-30% (79). Our proof-of-concept study is not a clinical trial, and nor did we test clinical outcomes. However, it may be that personalizing treatment, which is common in deep brain stimulation (80), may foster improved clinical outcomes for MDD.

The current pilot study should be considered an early-phase exploratory trial to test the feasibility of the mbNF approach and thus a single-group design was justified (81). Future studies should include appropriate control conditions as well as address other limitations in the current study, such as small sample size and lack of post-mbNF assessment of depression symptoms. Longitudinal symptom follow-up is critical for determining the trajectory of clinical benefit, as suggested by studies that indicate that the greatest symptom improvement may happen weeks to months after neurofeedback intervention (82). We can also further personalize the protocol by fine-tuning the optimal session length and number of sessions for each subject. For example, this study revealed that neurofeedback performance on the last run, not the average, was more predictive of neural and behavioral change, suggesting the length of the mbNF session may vary depending on how fast a participant reaches a certain threshold of performance. The scalability of the mbNF paradigm will also be greatly improved if this protocol can be implemented in less costly systems such as electroencephalography or functional near-infrared spectroscopy. In the long term, we

also aim to develop a closed-loop system for delivering mbNF intervention when suboptimal brain states (e.g., ruminative or suicidal) are detected in patients.

In summary, the mbNF protocol is a non-invasive and personalizable tool that could offer early intervention and alleviate depression in adolescents. Building on these promising findings, a key next step is to determine whether this approach leads to improvements in depressive symptoms, which has enormous potential to revolutionize our approach to clinical care.

### **Acknowledgements**

This study was supported by the NIMH R56MH121426 (SWG, AY, RPA) and R61/R33MH113751-01A1 (SWG), the Poitras Center for Psychiatric Disorders Research at Massachusetts Institute of Technology (SWG), and the Tommy Fuss Fund (RPA). The content is solely the responsibility of the authors and does not necessarily represent the official views of the National Institutes of Health. We would like to acknowledge Dr. Zhenghan Qi and Anqi Hu for providing short stories that we adapted for mindfulness training assessment.

**Conflict of Interest.** Dr. Auerbach is an unpaid scientific advisor for Ksana Health.

### **References**

1. Greenberg PE, Fournier AA, Sisitsky T, Pike CT, Kessler RC. The economic burden of adults with major depressive disorder in the United States (2005 and 2010). *J Clin Psychiatry*. 2015;76(2):155–62.
2. Avenevoli S, Swendsen J, He JP, Burstein M, Merikangas KR. Major depression in the national comorbidity survey-adolescent supplement: prevalence, correlates, and treatment. *J Am Acad Child Adolesc Psychiatry*. 2015;54(1):37–44.e2.
3. Rush AJ, Trivedi MH, Wisniewski SR, Nierenberg AA, Stewart JW, Warden D, et al. Acute and longer-term outcomes in depressed outpatients requiring one or several treatment steps: a STAR\*D report. *Am J Psychiatry*. 2006;163(11):1905–17.
4. Raichle ME, MacLeod AM, Snyder AZ, Powers WJ, Gusnard DA, Shulman GL. A default mode of brain function. *Proceedings of the National Academy of Sciences*. 2001 Jan 16;98(2):676.

5. Greicius MD, Krasnow B, Reiss AL, Menon V. Functional connectivity in the resting brain: a network analysis of the default mode hypothesis. *Proc Natl Acad Sci U S A*. 2003 Jan 7;100(1):253–8.
6. Greicius MD, Flores BH, Menon V, Glover GH, Solvason HB, Kenna H, et al. Resting-state functional connectivity in major depression: abnormally increased contributions from subgenual cingulate cortex and thalamus. *Biol Psychiatry*. 2007 Sep 1;62(5):429–37.
7. Hamilton JP, Farmer M, Fogelman P, Gotlib IH. Depressive Rumination, the Default-Mode Network, and the Dark Matter of Clinical Neuroscience. *Biol Psychiatry*. 2015 Aug 15;78(4):224–30.
8. Chai XJ, Hirshfeld-Becker D, Biederman J, Uchida M, Doehrmann O, Leonard JA, et al. Altered Intrinsic Functional Brain Architecture in Children at Familial Risk of Major Depression. *Biol Psychiatry*. 2016 Dec 1;80(11):849–58.
9. Michl LC, McLaughlin KA, Shepherd K, Nolen-Hoeksema S. Rumination as a mechanism linking stressful life events to symptoms of depression and anxiety: longitudinal evidence in early adolescents and adults. *J Abnorm Psychol*. 2013;122(2):339–52.
10. Zhou HX, Chen X, Shen YQ, Li L, Chen NX, Zhu ZC, et al. Rumination and the default mode network: Meta-analysis of brain imaging studies and implications for depression. *Neuroimage*. 2020 Feb 1;206:116287.
11. Sheline YI, Barch DM, Price JL, Rundle MM, Vaishnavi SN, Snyder AZ, et al. The default mode network and self-referential processes in depression. *Proc Natl Acad Sci U S A*. 2009 Feb 10;106(6):1942–7.
12. Rayner G, Jackson G, Wilson S. Cognition-related brain networks underpin the symptoms of unipolar depression: Evidence from a systematic review. *Neurosci Biobehav Rev*. 2016 Feb;61:53–65.
13. Fossati P. Circuit based anti-correlation, attention orienting, and major depression. *CNS Spectr*. 2019 Feb;24(1):94–101.
14. Abela JRZ, Hankin BL. Rumination as a vulnerability factor to depression during the transition from early to middle adolescence: A multiwave longitudinal study. *J Abnorm Psychol*. 2011 May;120(2):259–71.
15. Michalak J, Hölz A, Teismann T. Rumination as a predictor of relapse in mindfulness-based cognitive therapy for depression. *Psychol Psychother*. 2011 Jun;84(2):230–6.
16. Grassia M, Gibb BE. Rumination and prospective changes in depressive symptoms. *J Soc Clin Psychol*. 2008 Nov 1;27(9):931–48.
17. Jones NP, Siegle GJ, Thase ME. Effects of rumination and initial severity on remission to cognitive therapy for depression. *Cognit Ther Res [Internet]*. 2008 Aug 1;32(4). Available from: <http://dx.doi.org/10.1007/s10608-008-9191-0>
18. Whitfield-Gabrieli S, Ford JM. Default mode network activity and connectivity in psychopathology. *Annu Rev Clin Psychol*. 2012 Jan 6;8:49–76.
19. Liston C, Chen AC, Zebly BD, Drysdale AT, Gordon R, Leuchter B, et al. Default mode network



- mechanisms of transcranial magnetic stimulation in depression. *Biol Psychiatry*. 2014 Oct 1;76(7):517–26.
20. Davis NJ, van Koningsbruggen MG. “Non-invasive” brain stimulation is not non-invasive. *Front Syst Neurosci*. 2013 Dec 23;7:76.
  21. Brewer JA, Worhunsky PD, Gray JR, Tang YY, Weber J, Kober H. Meditation experience is associated with differences in default mode network activity and connectivity. *Proc Natl Acad Sci U S A*. 2011 Dec 13;108(50):20254–9.
  22. Ives-Deliperi VL, Solms M, Meintjes EM. The neural substrates of mindfulness: an fMRI investigation. *Soc Neurosci*. 2011;6(3):231–42.
  23. Feruglio S, Matiz A, Pagnoni G, Fabbro F, Crescentini C. The Impact of Mindfulness Meditation on the Wandering Mind: a Systematic Review. *Neurosci Biobehav Rev*. 2021 Dec;131:313–30.
  24. Scheibner HJ, Bogler C, Gleich T, Haynes JD, Bermpohl F. Internal and external attention and the default mode network. *Neuroimage*. 2017 Mar 1;148:381–9.
  25. Hasenkamp W, Wilson-Mendenhall CD, Duncan E, Barsalou LW. Mind wandering and attention during focused meditation: a fine-grained temporal analysis of fluctuating cognitive states. *Neuroimage*. 2012 Jan 2;59(1):750–60.
  26. Bauer CCC, Whitfield-Gabrieli S, Díaz JL, Pasaye EH, Barrios FA. From State-to-Trait Meditation: Reconfiguration of Central Executive and Default Mode Networks. *eNeuro* [Internet]. 2019 Dec 4;6(6). Available from: <http://dx.doi.org/10.1523/ENEURO.0335-18.2019>
  27. Hofmann SG, Gómez AF. Mindfulness-Based Interventions for Anxiety and Depression. *Psychiatr Clin North Am*. 2017 Dec;40(4):739–49.
  28. Strohmaier S, Jones FW, Cane JE. Effects of Length of Mindfulness Practice on Mindfulness, Depression, Anxiety, and Stress: a Randomized Controlled Experiment. *Mindfulness* . 2021 Jan 1;12(1):198–214.
  29. Khoury B, Lecomte T, Fortin G, Masse M, Therien P, Bouchard V, et al. Mindfulness-based therapy: a comprehensive meta-analysis. *Clin Psychol Rev*. 2013 Aug;33(6):763–71.
  30. Wielgosz J, Goldberg SB, Kral TRA, Dunne JD, Davidson RJ. Mindfulness Meditation and Psychopathology. *Annu Rev Clin Psychol*. 2019 May 7;15:285–316.
  31. Bauer CCC, Caballero C, Scherer E, West MR, Mrazek MD, Phillips DT, et al. Mindfulness training reduces stress and amygdala reactivity to fearful faces in middle-school children. *Behav Neurosci*. 2019;133(6):569–85.
  32. Bauer CCC, Rozenkrantz L, Caballero C, Nieto-Castanon A, Scherer E, West MR, et al. Mindfulness training preserves sustained attention and resting state anticorrelation between default-mode network and dorsolateral prefrontal cortex: A randomized controlled trial. *Hum Brain Mapp* [Internet]. 2020 Sep 24; Available from: <http://dx.doi.org/10.1002/hbm.25197>
  33. Bauer CCC, Zhang J, Morfini F, Kucyi A, Raya J, Urban Z, et al. REMind: Real-time neurofeedback enhanced mindfulness protocol using multivariate and univariate real-time functional imaging (MURFI) [Internet]. 2022 Feb [cited 2022 Jul 20]. Available from: <https://www.protocols.io/view/multivariate-and-univariate-real-time-functional-i-b5bhq2j6>

34. Tursic A, Eck J, Lührs M, Linden DEJ, Goebel R. A systematic review of fMRI neurofeedback reporting and effects in clinical populations. *Neuroimage Clin.* 2020 Nov 11;28:102496.
35. Bauer CCC, Okano K, Ghosh SS, Lee YJ, Melero H, Angeles CL, et al. Real-time fMRI neurofeedback reduces auditory hallucinations and modulates resting state connectivity of involved brain regions: Part 2: Default mode network -preliminary evidence. *Psychiatry Res.* 2020;284:112770.
36. Okano K, Bauer CCC, Ghosh SS, Lee YJ, Melero H, de Los Angeles C, et al. Real-time fMRI feedback impacts brain activation, results in auditory hallucinations reduction: Part 1: Superior temporal gyrus -Preliminary evidence. *Psychiatry Res.* 2020 Feb 10;286:112862.
37. Hubbard NA, Siless V, Frosch IR, Goncalves M, Lo N, Wang J, et al. Brain function and clinical characterization in the Boston adolescent neuroimaging of depression and anxiety study. *Neuroimage Clin.* 2020 Mar 12;27:102240.
38. Siless V, Hubbard NA, Jones R, Wang J, Lo N, Bauer CCC, et al. Image acquisition and quality assurance in the Boston Adolescent Neuroimaging of Depression and Anxiety study. *Neuroimage Clin.* 2020 Mar 19;26:102242.
39. Kaufman J, Birmaher B, Brent D, Rao U, Flynn C, Moreci P, et al. Schedule for Affective Disorders and Schizophrenia for School-Age Children-Present and Lifetime Version (K-SADS-PL): initial reliability and validity data. *J Am Acad Child Adolesc Psychiatry.* 1997 Jul;36(7):980–8.
40. Angold A, Costello EJ, Messer SC, Pickles A. Development of a short questionnaire for use in epidemiological studies of depression in children and adolescents. *Int J Methods Psychiatr Res.* 1995 Dec;5(4):237–49.
41. de Ross RL, Gullone E, Chorpita BF. The Revised Child Anxiety and Depression Scale: A Psychometric Investigation with Australian Youth. *Behav Change.* 2002 Jun;19(2):90–101.
42. Jenkinson M, Beckmann CF, Behrens TEJ, Woolrich MW, Smith SM. FSL. *Neuroimage.* 2012 Aug 15;62(2):782–90.
43. Beckmann CF, Smith SM. Probabilistic independent component analysis for functional magnetic resonance imaging. *IEEE Trans Med Imaging.* 2004 Feb;23(2):137–52.
44. Yeo BTT, Krienen FM, Sepulcre J, Sabuncu MR, Lashkari D, Hollinshead M, et al. The organization of the human cerebral cortex estimated by intrinsic functional connectivity. *J Neurophysiol.* 2011 Sep;106(3):1125–65.
45. Franco AR, Pritchard A, Calhoun VD, Mayer AR. Interrater and intermethod reliability of default mode network selection. *Hum Brain Mapp.* 2009 Jul;30(7):2293–303.
46. Tanay G, Bernstein A. State Mindfulness Scale (SMS): development and initial validation. *Psychol Assess.* 2013 Dec;25(4):1286–99.
47. Sayadaw C. *Practical Insight Meditation.* Lokachantha; 2014. 117 p.
48. Hinds O, Ghosh S, Thompson TW, Yoo JJ, Whitfield-Gabrieli S, Triantafyllou C, et al. Computing moment-to-moment BOLD activation for real-time neurofeedback. *Neuroimage.* 2011 Jan 1;54(1):361–8.

49. Esteban O, Markiewicz CJ, Blair RW, Moodie CA, Isik AI, Erramuzpe A, et al. fMRIprep: a robust preprocessing pipeline for functional MRI. *Nat Methods*. 2019 Jan;16(1):111–6.
50. Esteban, Blair, Markiewicz, Berleant. fmriprep. *Softw - Concepts Tools*.
51. Gorgolewski K, Burns CD, Madison C, Clark D, Halchenko YO, Waskom ML, et al. Nipype: a flexible, lightweight and extensible neuroimaging data processing framework in python. *Front Neuroinform*. 2011 Aug 22;5:13.
52. Gorgolewski, Esteban, Markiewicz, Ziegler. Nipype. *Softw - Concepts Tools*.
53. Whitfield-Gabrieli S, Nieto-Castanon A. Conn: a functional connectivity toolbox for correlated and anticorrelated brain networks. *Brain Connect*. 2012 Jul 19;2(3):125–41.
54. Nieto-Castanon A. *Handbook of functional connectivity Magnetic Resonance Imaging methods in CONN*. Hilbert Press; 2020. 108 p.
55. Behzadi Y, Restom K, Liao J, Liu TT. A component based noise correction method (CompCor) for BOLD and perfusion based fMRI. *Neuroimage*. 2007 Aug 1;37(1):90–101.
56. Whitfield-Gabrieli S, Wendelken C, Nieto-Castañón A, Bailey SK, Anteraper SA, Lee YJ, et al. Association of Intrinsic Brain Architecture With Changes in Attentional and Mood Symptoms During Development. *JAMA Psychiatry*. 2020 Apr 1;77(4):378–86.
57. Jenkinson M, Bannister P, Brady M, Smith S. Improved optimization for the robust and accurate linear registration and motion correction of brain images. *Neuroimage*. 2002 Oct;17(2):825–41.
58. Fox MD, Snyder AZ, Vincent JL, Corbetta M, Van Essen DC, Raichle ME. The human brain is intrinsically organized into dynamic, anticorrelated functional networks. *Proc Natl Acad Sci U S A*. 2005 Jul 5;102(27):9673–8.
59. Baron RM, Kenny DA. The moderator–mediator variable distinction in social psychological research: Conceptual, strategic, and statistical considerations. *J Pers Soc Psychol*. 1986 Dec;51(6):1173–82.
60. Preacher KJ, Hayes AF. Asymptotic and resampling strategies for assessing and comparing indirect effects in multiple mediator models [Internet]. Vol. 40, *Behavior Research Methods*. 2008. p. 879–91. Available from: <http://dx.doi.org/10.3758/brm.40.3.879>
61. Öngür, Drevets, Price. Glial reduction in the subgenual prefrontal cortex in mood disorders. *Proc Estonian Acad Sci Biol Ecol* [Internet]. Available from: <https://www.pnas.org/content/95/22/13290.short>
62. Drevets WC, Price JL, Simpson JR Jr, Todd RD, Reich T, Vannier M, et al. Subgenual prefrontal cortex abnormalities in mood disorders. *Nature*. 1997 Apr 24;386(6627):824–7.
63. Mayberg HS, Liotti M, Brannan SK, McGinnis S, Mahurin RK, Jerabek PA, et al. Reciprocal limbic-cortical function and negative mood: converging PET findings in depression and normal sadness. *Am J Psychiatry*. 1999 May;156(5):675–82.
64. Ducharme S, Albaugh MD, Hudziak JJ, Botteron KN, Nguyen TV, Truong C, et al. Anxious/depressed symptoms are linked to right ventromedial prefrontal cortical thickness maturation in healthy children and young adults. *Cereb Cortex*. 2014 Nov;24(11):2941–50.

65. Auerbach RP, Pagliaccio D, Hubbard NA, Frosch I, Kremens R, Cosby E, et al. Reward-Related Neural Circuitry in Depressed and Anxious Adolescents: A Human Connectome Project [Internet]. *Journal of the American Academy of Child & Adolescent Psychiatry*. 2021. Available from: <http://dx.doi.org/10.1016/j.jaac.2021.04.014>
66. Rodríguez-Cano E, Sarró S, Monté GC, Maristany T, Salvador R, McKenna PJ, et al. Evidence for structural and functional abnormality in the subgenual anterior cingulate cortex in major depressive disorder. *Psychol Med*. 2014 Nov;44(15):3263–73.
67. LeWinn KZ, Connolly CG, Wu J, Drahos M, Hoeft F, Ho TC, et al. White matter correlates of adolescent depression: structural evidence for frontolimbic disconnectivity. *J Am Acad Child Adolesc Psychiatry*. 2014 Aug;53(8):899–909, 909.e1–7.
68. Heij GJ, Penninx BWHJ, van Velzen LS, van Tol MJ, van der Wee NJA, Veltman DJ, et al. White matter architecture in major depression with anxious distress symptoms. *Prog Neuropsychopharmacol Biol Psychiatry*. 2019 Aug 30;94:109664.
69. Bracht T, Linden D, Keedwell P. A review of white matter microstructure alterations of pathways of the reward circuit in depression. *J Affect Disord*. 2015 Nov 15;187:45–53.
70. Harrison R, Zeidan F, Kitsaras G, Ozcelik D, Salomons TV. Trait Mindfulness Is Associated With Lower Pain Reactivity and Connectivity of the Default Mode Network. *J Pain*. 2019 Jun;20(6):645–54.
71. Hunt C, Letzen JE, Krimmel SR, Burrowes SAB, Haythornthwaite JA, Finan P, et al. Is mindfulness associated with lower pain reactivity and connectivity of the default mode network? A replication and extension study in healthy and episodic migraine participants [Internet]. *bioRxiv*. 2022. Available from: <https://www.medrxiv.org/content/10.1101/2022.01.18.22269473v2>
72. Kirlic N, Cohen ZP, Tsuchiyagaito A, Misaki M, McDermott TJ, Aupperle RL, et al. Self-regulation of the posterior cingulate cortex with real-time fMRI neurofeedback augmented mindfulness training in healthy adolescents: A nonrandomized feasibility study. *Cogn Affect Behav Neurosci* [Internet]. 2022 Mar 15; Available from: <https://doi.org/10.3758/s13415-022-00991-4>
73. Egan SJ, Rees CS, Delalande J, Greene D, Fitzallen G, Brown S, et al. A Review of Self-Compassion as an Active Ingredient in the Prevention and Treatment of Anxiety and Depression in Young People. *Adm Policy Ment Health*. 2022 May;49(3):385–403.
74. Montero-Marin J, Allwood M, Ball S, Crane C, De Wilde K, Hinze V, et al. School-based mindfulness training in early adolescence: what works, for whom and how in the MYRIAD trial? *Evid Based Ment Health* [Internet]. 2022 Jul 7 [cited 2022 Jul 13]; Available from: <https://ebmh.bmj.com/content/early/2022/07/07/ebmental-2022-300439>
75. Ramot M, Gonzalez-Castillo J. A framework for offline evaluation and optimization of real-time algorithms for use in neurofeedback, demonstrated on an instantaneous proxy for correlations. *Neuroimage*. 2019 Mar;188:322–34.
76. Zhang J, Kucyi A, Raya J, Nielsen AN, Nomi JS, Damoiseaux JS, et al. What have we really learned from functional connectivity in clinical populations? *Neuroimage*. 2021 Nov 15;242:118466.
77. Taylor JE, Yamada T, Kawashima T, Kobayashi Y, Yoshihara Y, Miyata J, et al. Depressive symptoms reduce when dorsolateral prefrontal cortex-precuneus connectivity normalizes after

- functional connectivity neurofeedback. *Sci Rep*. 2022 Feb 16;12(1):2581.
78. Insel TR. The NIMH Research Domain Criteria (RDoC) Project: precision medicine for psychiatry. *Am J Psychiatry*. 2014 Apr;171(4):395–7.
  79. McClintock SM, Reti IM, Carpenter LL, McDonald WM, Dubin M, Taylor SF, et al. Consensus Recommendations for the Clinical Application of Repetitive Transcranial Magnetic Stimulation (rTMS) in the Treatment of Depression. *J Clin Psychiatry* [Internet]. 2018;79(1). Available from: <http://dx.doi.org/10.4088/JCP.16cs10905>
  80. Mayberg HS, Riva-Posse P, Crowell AL. Deep Brain Stimulation for Depression: Keeping an Eye on a Moving Target. *JAMA Psychiatry*. 2016 May 1;73(5):439–40.
  81. Sorger B, Scharnowski F, Linden DEJ, Hampson M, Young KD. Control freaks: Towards optimal selection of control conditions for fMRI neurofeedback studies. *Neuroimage*. 2019 Feb 1;186:256–65.
  82. Rance M, Walsh C, Sukhodolsky DG, Pittman B, Qiu M, Kichuk SA, et al. Time course of clinical change following neurofeedback. *Neuroimage*. 2018 Nov 1;181:807–13.

**Table 1. Sociodemographic and clinical information ( $n = 9$ )**

**Category**

---

**Sociodemographic**

|                                  |              |
|----------------------------------|--------------|
| Age (mean/SD)                    | 18.8 (0.7)   |
| Sex: female ( $n/\%$ )           | 6 (66.7)     |
| Pubertal status: stage (mean/SD) | 4.28 (0.6)   |
| Handedness: right ( $n/\%$ )     | 9 (100.0)    |
| Race: White ( $n/\%$ )           | 8 (88.9)     |
| IQ (mean/SD)                     | 115.1 (15.3) |

**Current Symptoms (mean/SD)**

|                                  |             |
|----------------------------------|-------------|
| Depression symptoms (MFQ)        | 17.4 (13.7) |
| General anxiety symptoms (RCADS) | 3.7 (2.7)   |
| Social anxiety symptoms (RCADS)  | 13.1 (6.5)  |

**Current Psychiatric Disorders ( $n/\%$ )**

|                                           |          |
|-------------------------------------------|----------|
| Comorbid depression and anxiety disorders | 2 (22.2) |
| Anxiety disorders                         | 3 (33.3) |
| ADHD                                      | 2 (22.2) |
| Eating disorders                          | 0 (0)    |
| OCD or related disorders                  | 1 (11.1) |
| Disruptive disorders                      | 0 (0)    |

|                                                            |          |
|------------------------------------------------------------|----------|
| Any comorbidity (beyond primary depression and/or anxiety) | 3 (33.3) |
|------------------------------------------------------------|----------|

**Lifetime Psychiatric Disorders (*n*/%)**

|                                                            |           |
|------------------------------------------------------------|-----------|
| Comorbid depression and anxiety disorder                   | 5 (55.5)  |
| Anxiety disorders                                          | 9 (100.0) |
| ADHD                                                       | 4 (44.4)  |
| Eating disorders                                           | 1 (11.1)  |
| OCD or related disorders                                   | 3 (33.3)  |
| Disruptive disorders                                       | 1 (11.1)  |
| Any comorbidity (beyond primary depression and/or anxiety) | 5 (55.5)  |

**Current medication (*n*/%)**

|                              |          |
|------------------------------|----------|
| Antidepressant medication    | 6 (66.7) |
| ADHD medication              | 3 (33.3) |
| Other psychiatric medication | 0 (0)    |
| Any psychiatric medication   | 6 (66.7) |

---

*Note.* Anxiety disorders = generalized anxiety disorder ( $n_{current} = 1$ ,  $n_{lifetime} = 3$ ), social phobia ( $n_{current} = 2$ ,  $n_{lifetime} = 6$ ), separation anxiety ( $n_{current} = 0$ ,  $n_{lifetime} = 1$ ), and specific phobia ( $n_{current} = 0$ ,  $n_{lifetime} = 1$ ); Eating disorders = bulimia ( $n_{current} = 0$ ,  $n_{lifetime} = 1$ ); OCD or related disorders = OCD ( $n_{current} = 1$ ,  $n_{lifetime} = 1$ ), excoriation ( $n_{current} = 0$ ,  $n_{lifetime} = 1$ ), hoarding, trichotillomania ( $n_{current} = 0$ ,  $n_{lifetime} = 1$ ); Disruptive disorders = oppositional defiant disorder ( $n_{current} = 0$ ,  $n_{lifetime} = 1$ ). ADHD

## Mindfulness-Based Neurofeedback

attention-deficit/hyperactivity disorder, MFQ Mood and Feelings Questionnaire,

OCD obsessive-compulsive disorder, RCADS Revised Child Anxiety and

Depression Scale.



## Figure Legends

**Figure 1.** Mindfulness-based neurofeedback (mbNF). During mbNF, participants were instructed to practice mindfulness to move the white dot on the screen up into the red circle. The movement of the white dot was dependent on a real-time analysis of the fMRI data that computed the difference in personalized CEN and DMN activations. When CEN activation is higher than DMN activation, the white dot moves up; when CEN activation is lower than DMN activation, the white dot moves down.

**Figure 2.** Higher DMN functional connectivity was associated with more severe depression symptoms at baseline. **A)** We used a 8mm spherical seed in the sgACC (56). **B)** Functional connectivity between the sgACC seed and the MPFC positively correlated with symptom severity. Higher MFQ score indicates higher severity. Arrow indicates the peak of the MPFC cluster that survived  $p < 0.001$  (uncorrected). Figure is displayed at  $p < 0.05$  (uncorrected) and the color bar range reflects minimum and maximum  $t$  values in the connectivity map. **C)** Scatterplot illustrates the correlation between baseline MFQ and baseline sgACC-MPFC functional connectivity. All participants had a lifetime history of MDD and/or anxiety. Patients with current diagnoses are labeled with a diamond for having comorbid anxiety and depression ('MDD + anx') and a triangle for having anxiety only ('anx').

**Figure 3.** One session of mbNF reduced DMN functional connectivity. **A)** A t-test revealed that after mbNF, there was reduced connectivity between sgACC seed and midline DMN regions. Arrows indicate peaks in MPFC and PCC that survived  $q_{FDR} < 0.05$ . Pre and post connectivity maps are displayed at  $p < 0.001$  (uncorrected). Post vs. Pre contrast map is displayed at  $p < 0.05$  (uncorrected). Color bar ranges reflect minimum and maximum  $t$  values in the maps. **B)** Reduced sgACC-MPFC connectivity was found in all participants. Each bar represents the change in functional connectivity strength in a participant. **C)** Reduced sgACC-MPFC connectivity was associated with better neurofeedback performance. Patients with current diagnoses are labeled. All participants had a lifetime history of MDD and/or anxiety. Patients

with current diagnoses are labeled with a diamond for having comorbid anxiety and depression ('MDD + anx') and a triangle for having anxiety only ('anx').

**Figure 4.** One session of mbNF induced state mindfulness change. **A)** Higher increase in state mindfulness after mbNF was associated with more decrease in sgACC-MPFC functional connectivity. Patients with current diagnoses are labeled. Anx: anxiety; dep: depression. **B)** Reduction in sgACC-MPFC connectivity fully mediated the association between better neurofeedback performance and increase in state mindfulness. Arrows indicate paths and path values indicate standardized beta weights. The upper panel shows the total effect (unmediated path a, total effect) from neurofeedback performance to state mindfulness change. In the lower panel, the effect of neurofeedback performance on state mindfulness change is fully mediated by the change in sgACC-MPFC functional connectivity. The direct effect of neurofeedback performance to state mindfulness change is indicated by path a' and the indirect effect is indicated by the bc path (i.e., path b\*path c). \* $p < 0.05$ .

Figure 1

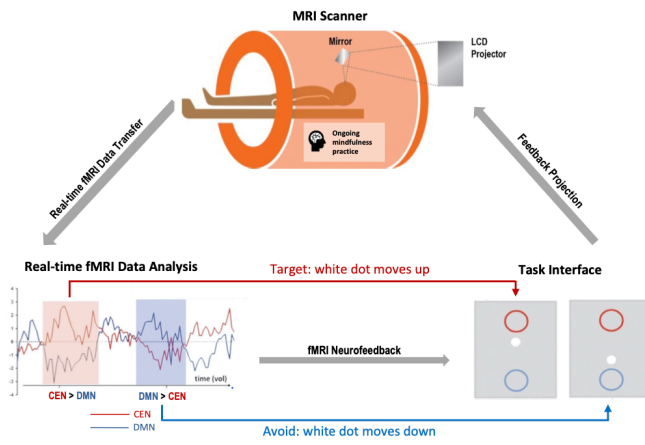

Figure 2

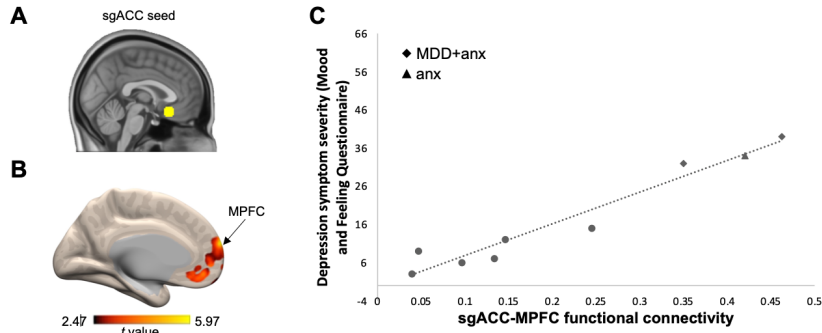

Figure 3

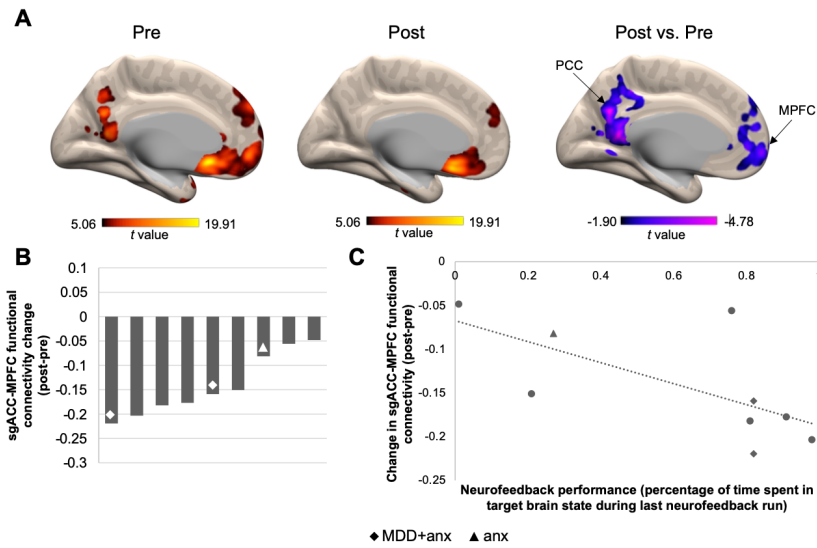

Figure 4

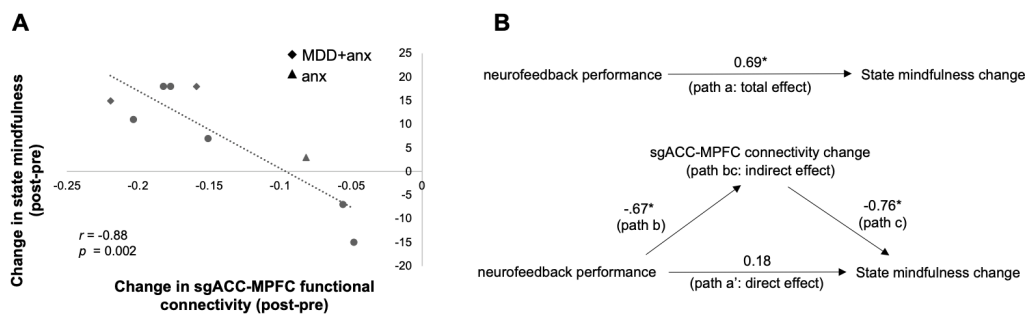

Source: https://www.biorxiv.org/content/10.1101/2022.08.22.504796v1.full.pdf
